# Supplementary material for: Interaction between elevated temperature and different types of Na-salicylate treatment in Brachypodium dystachion
Source: PubMed Central journal article supplement (PMC6957344; doi:10.1371/journal.pone.0227608), 2020-01-13

## Fig S3. HPLC analyses

### A) Salicylic acid, benzoic acid, cinnamic acid, abscisic acid, jasmonic acid and flavonols

W2690 separation modul (Waters)

Column: Synergy 4  $\mu\text{m}$  Fusion-RP 80A 150x4.6 mm (Phenomenex)

Pre-column: ODS Hypersil 5  $\mu\text{m}$  10x4 mm (ThermoScientific)

Column temperature: 30 °C

Sample temperature: 10 °C

Solvents:

A: Water+0.1% HCOOH

B: Acetonitril+0.1% HCOOH

Flow rate: 1 ml min<sup>-1</sup>

Gradient:

| Time    | A% | B%  |
|---------|----|-----|
| Initial | 85 | 15  |
| 10      | 50 | 50  |
| 11      | 0  | 100 |
| 15      | 0  | 100 |
| 16      | 85 | 15  |
| 28      | 85 | 15  |

Detector parameters:

W996 photodiode array detector (Waters):

Wavelength range: 210-320 nm; Sampling rate: 5 spectra/s; Resolution: 2.4 nm

Detected compounds:

240 nm: benzoic acid (RT: 8.198); cinnamic acid (RT: 9.533)

260 nm: rutin (RT: 6.014); myricetin (RT: 8.261); abscisic acid (RT: 9.181); quercetin (RT: 9.859); kaempferol (RT: 11.485)

300 nm: jasmonic acid (RT: 10.990)

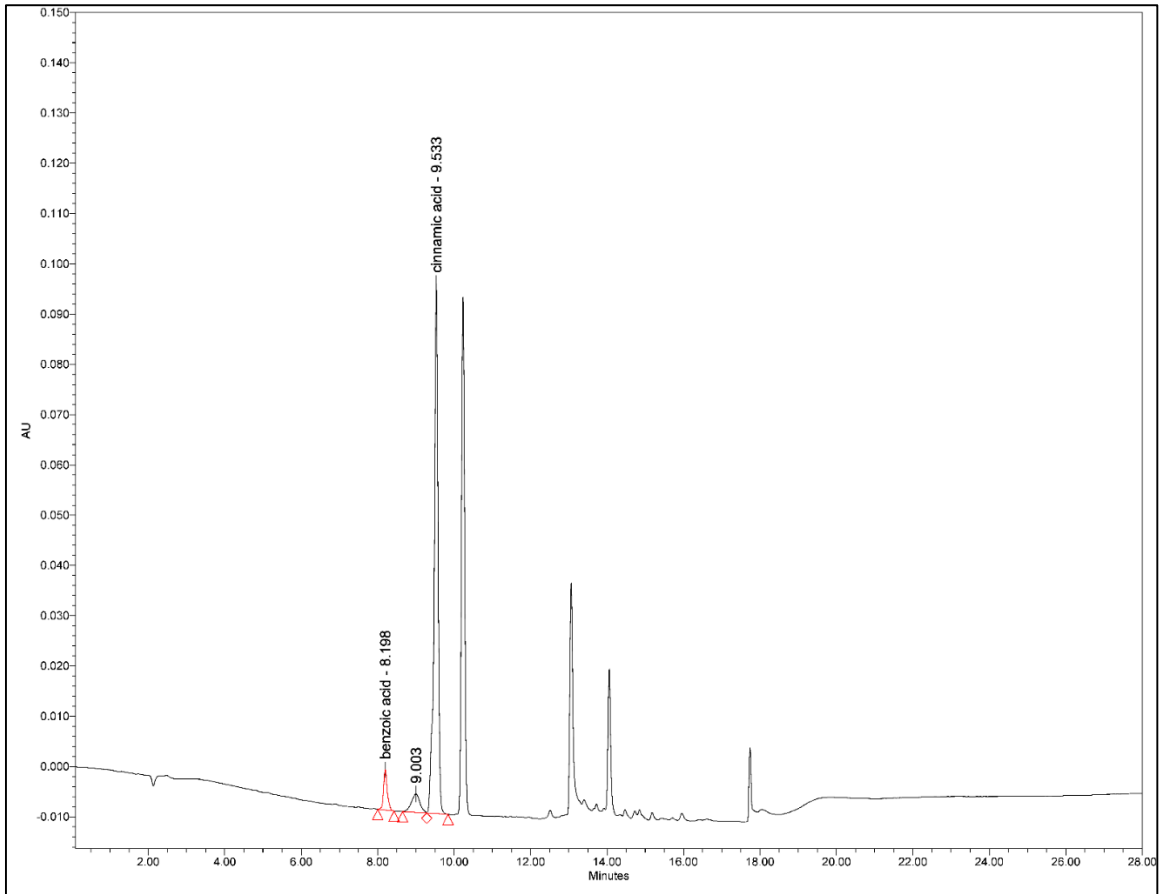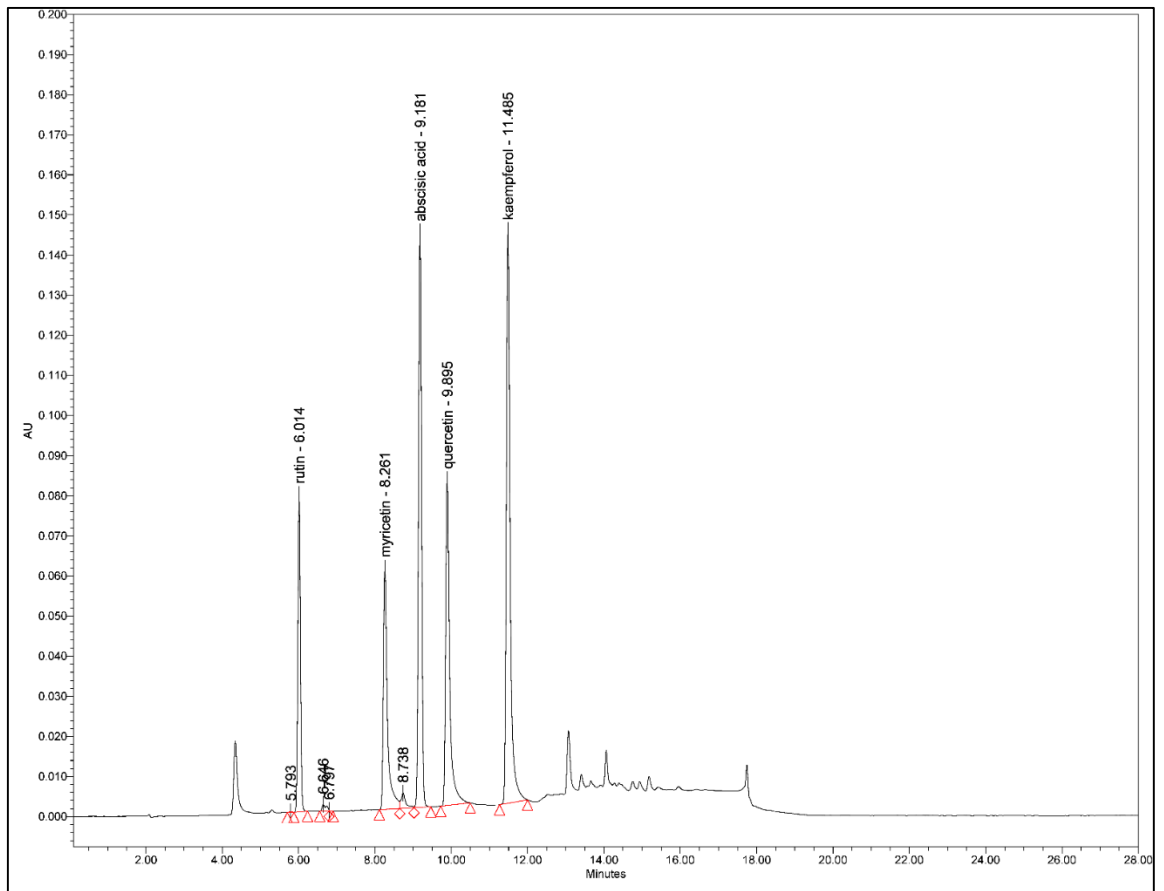

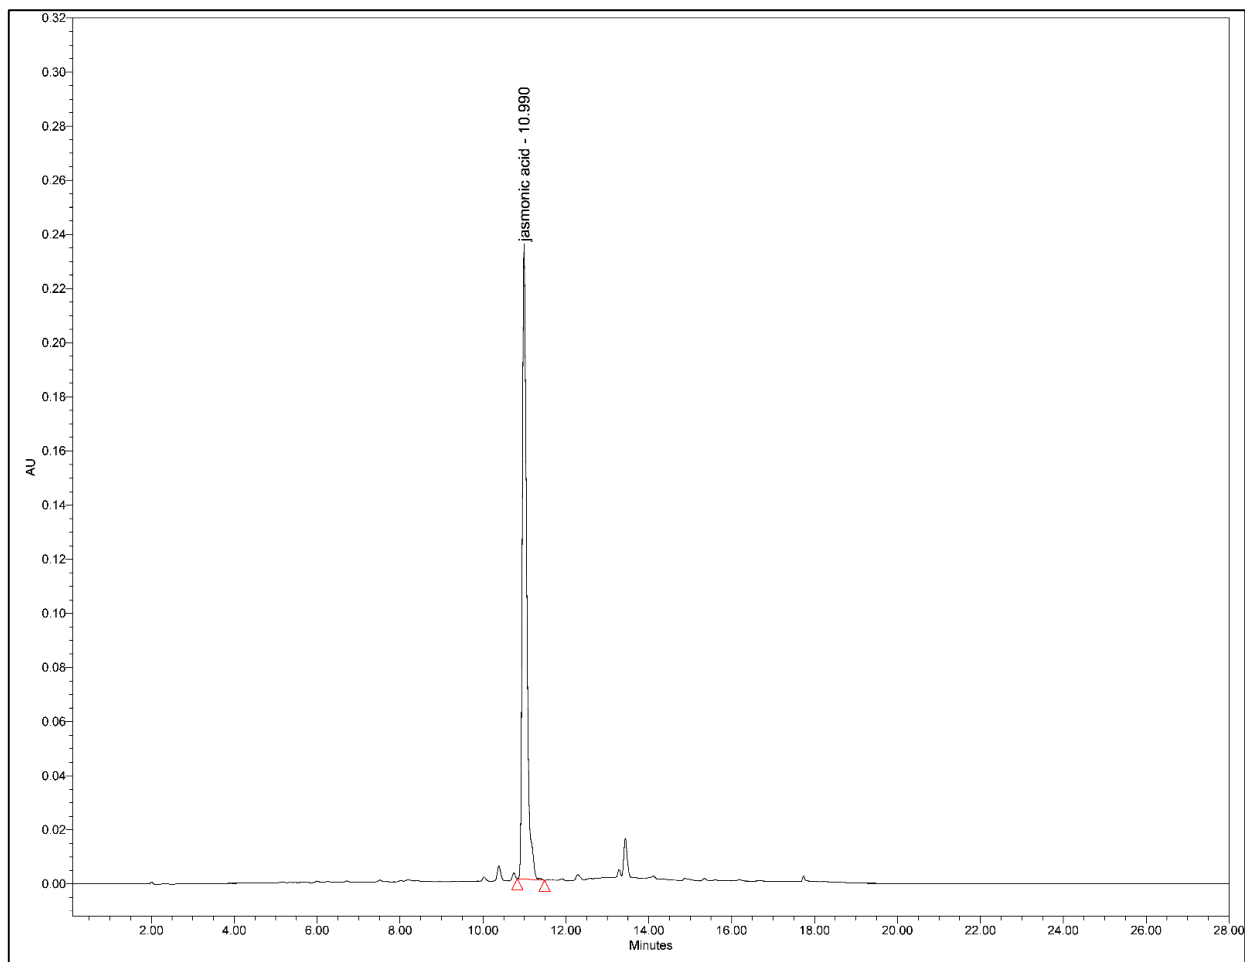

W474 scanning fluorescence detector (Waters):

Salicylic acid: excitation $\lambda$ : 305 nm; emission $\lambda$ : 407 nm; RT: 9.392

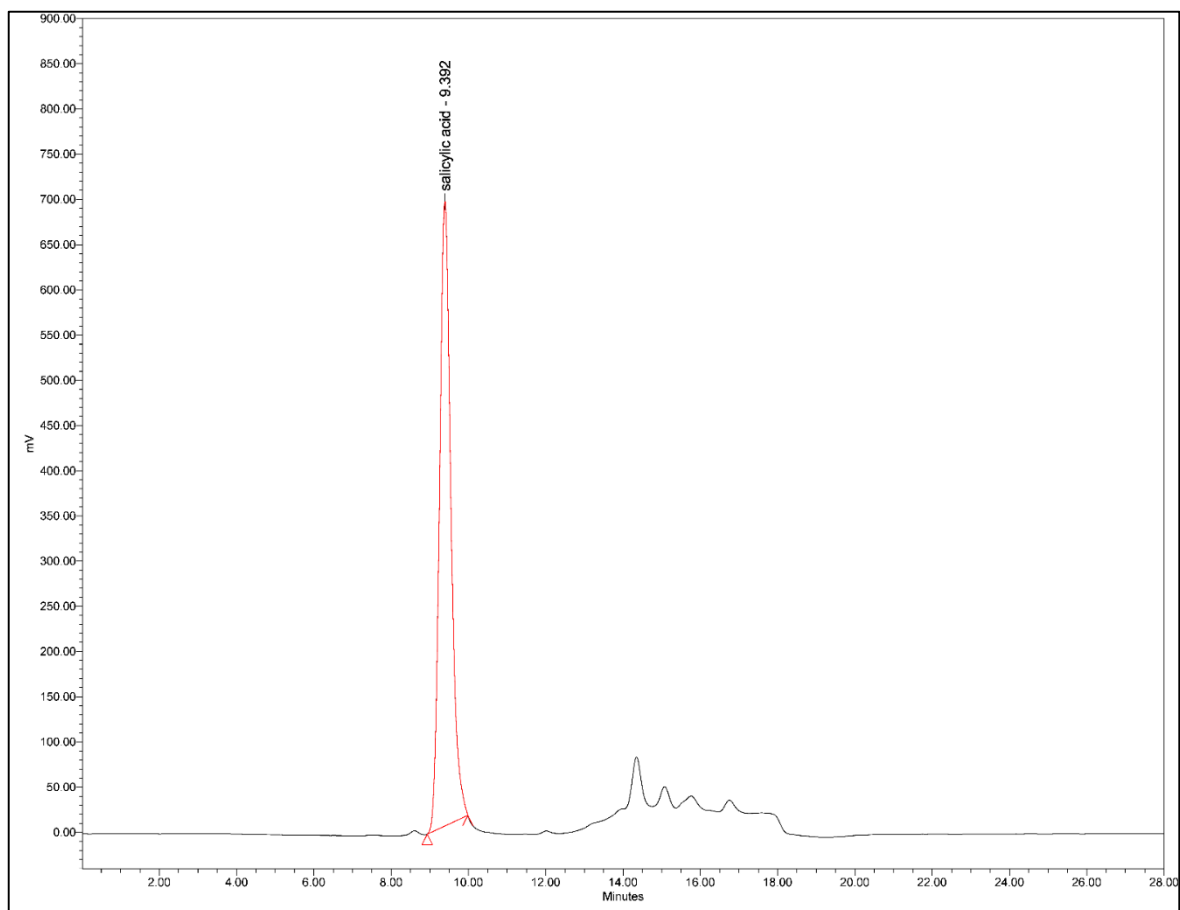

## B) Glutathione

W2690 separation modul (Waters)

Column: HyperPrep HS C18 100A 8  $\mu\text{m}$  250x4.6 mm (ThermoScientific)

Pre-column: HyperPrep HS BDS C18 100A 8  $\mu\text{m}$  10x4 mm (ThermoScientific)

Column temperature: 30  $^{\circ}\text{C}$

Sample temperature: 10  $^{\circ}\text{C}$

Solvents:

A: 10% methanol+0.25%  $\text{CH}_3\text{COOH}$  pH 3.9

B: 90% methanol+0.25%  $\text{CH}_3\text{COOH}$

Flow rate: 1  $\text{ml min}^{-1}$

Gradient:

| Time    | A%  | B%  |
|---------|-----|-----|
| Initial | 100 | 0   |
| 10      | 92  | 8   |
| 15      | 86  | 14  |
| 17.5    | 0   | 100 |
| 25.5    | 0   | 100 |
| 26.5    | 100 | 0   |
| 31      | 100 | 0   |

Detector parameters:

W474 scanning fluorescence detector (Waters):

excitation $_{\lambda}$ : 380 nm; emission $_{\lambda}$ : 480 nm; RT: 16.153

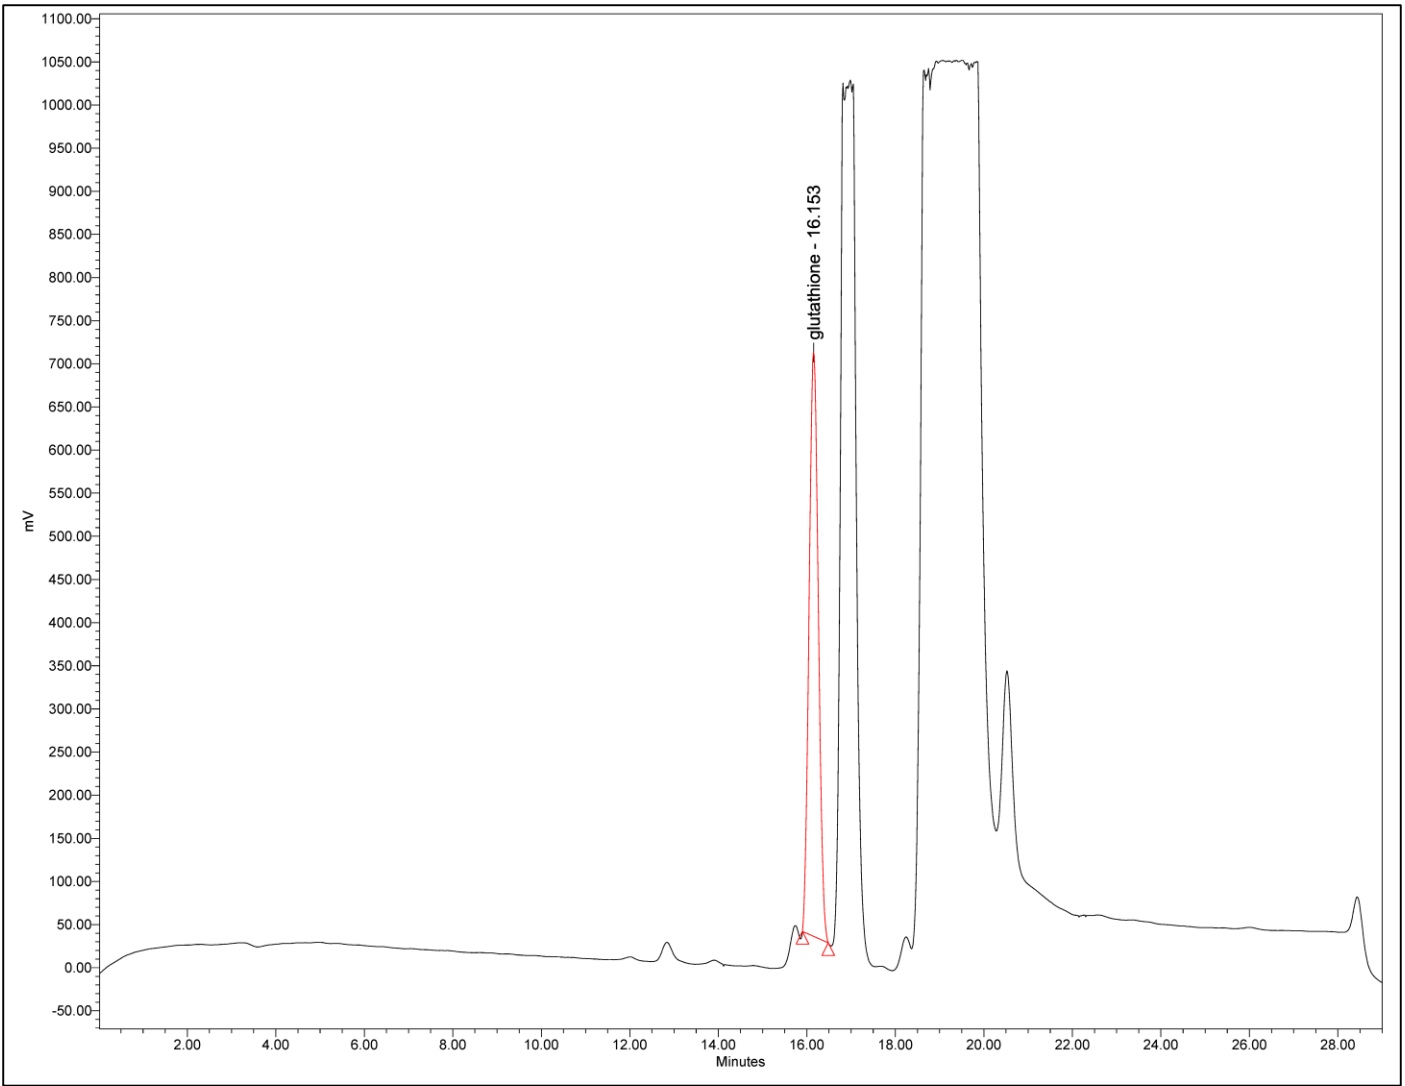

Supplement: pone.0227608.s003.pdf [file pone.0227608.s003.pdf]
