# Supplementary material for: Interaction between elevated temperature and different types of Na-salicylate treatment in Brachypodium dystachion
Source: PubMed Central journal article supplement (PMC6957344; doi:10.1371/journal.pone.0227608), 2020-01-13

Fig S2. *Brachypodium distachyon* plants after 35°C elevated temperature treatment.

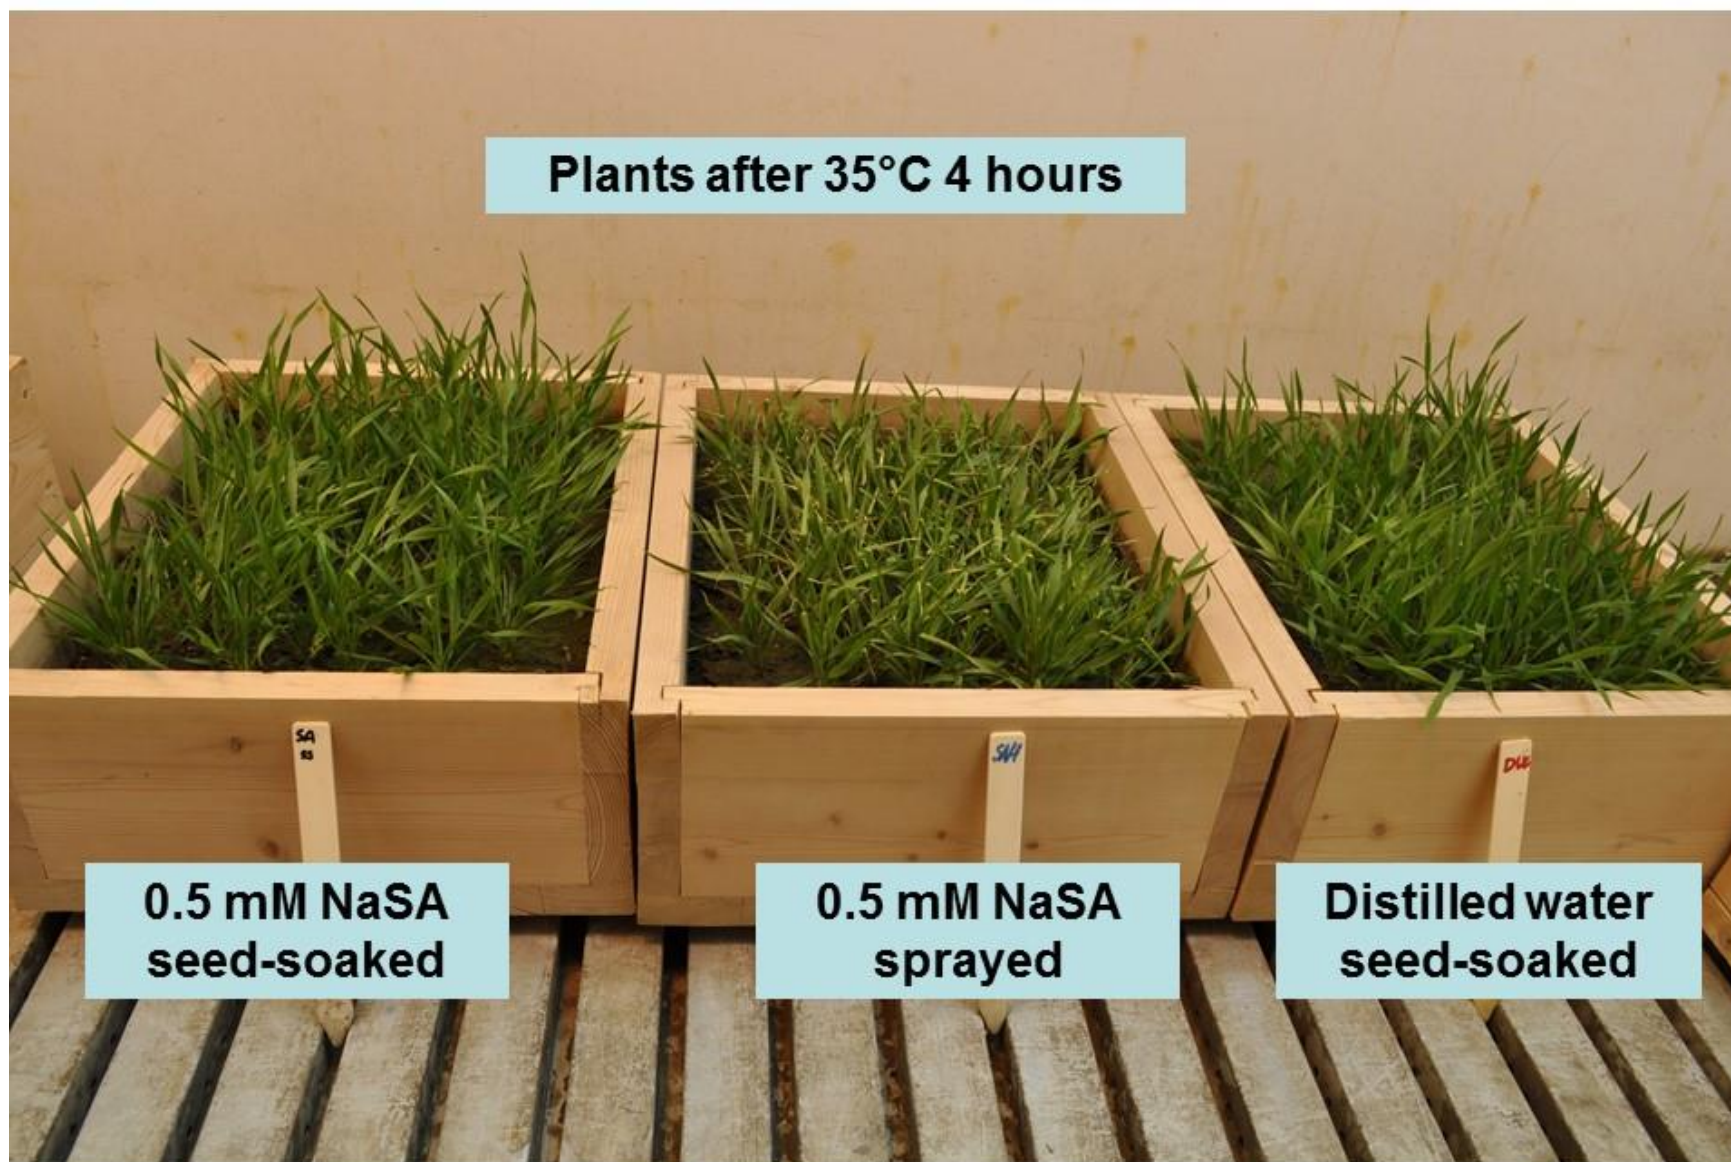

Supplement: pone.0227608.s002.pdf [file pone.0227608.s002.pdf]
